# Supplementary material for: Eating Behavior, Low-Frequency Functional Mutations in the Melanocortin-4 Receptor (MC4R) Gene, and Outcomes of Bariatric Operations: A 6-Year Prospective Study
Source: Oxford University Press journal article supplement (doi:10.2337/dc16-0115), 2016-05-23
Supplement: dc160115supplementarydata.pdf [file dc160115supplementarydata.pdf]

# Supplementary Table S1. Genetic and functional effect of the 16 non-synonymous mutations identified in *MC4R*

| Mutation           | rs ID       | MAF*   | Previously reported (ref #) | Functional effect on cAMP activity** |
|--------------------|-------------|--------|-----------------------------|--------------------------------------|
| c.106T>A / p.S36T  | NA          | NA     | No                          | Neutral                              |
| c.281G>A / p.S94N  | NA          | NA     | Yes (1)                     | LOF                                  |
| c.307G>A / p.V103I | rs2229616   | 0.0185 | Yes (2)                     | GOF                                  |
| c.335C>T / p.T112M | rs13447329  | 0.0007 | Yes (2)                     | LOF                                  |
| c.376G>T / p.D126Y | NA          | NA     | Yes (1)                     | LOF                                  |
| c.380C>T / p.S127L | rs13447331  | 0.0001 | Yes (2)                     | LOF                                  |
| c.382G>T / p.V128L | NA          | NA     | No                          | Neutral                              |
| c.493C>T / p.R165W | rs13447332  | NA     | Yes (2)                     | LOF                                  |
| c.523G>A / p.A175T | rs121913563 | 0.001  | Yes (3)                     | LOF                                  |
| c.553A>T / p.I185F | NA          | NA     | No                          | LOF                                  |
| c.736A>G / p.T246A | NA          | NA     | No                          | LOF                                  |
| c.751A>C / p.I251L | rs52820871  | 0.0116 | Yes (2)                     | GOF                                  |
| c.751A>T / p.I251F | NA          | NA     | No                          | LOF                                  |
| c.896C>A / p.P299H | rs52804924  | NA     | Yes (2)                     | LOF                                  |
| c.902T>C / p.I301T | NA          | NA     | Yes (2)                     | LOF                                  |
| c.919C>T / p.Q307* | NA          | NA     | Yes (4)                     | LOF                                  |

\*MAF in European-Americans according to the Exome Sequencing Project

\*\*Functional effect on cAMP activity according to the present study (see **Supplementary Figure S3**) or previous ones.

**GOF**, gain-of-function; **LOF**, loss-of-function; **MAF**, minor allele frequency; **NA**, not available.

## Supplementary Figure S1. Design of the study

**AGB**, adjustable gastric banding; **HYB**, AGB plus duodenal switch; **GOF**, gain-of-function in *MC4R*; **LOF**, loss-of-function in *MC4R*; **RGB**, Roux-en Y gastric bypass; **WT**, wild-type.

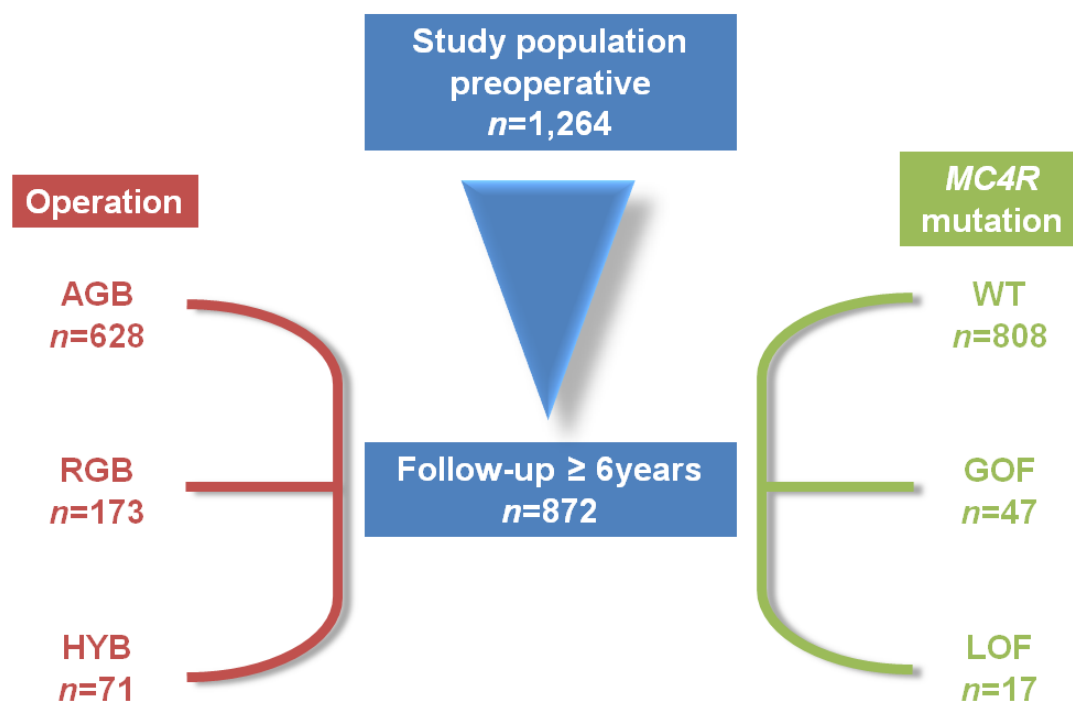

## Supplementary Figure S2. Gastrointestinal operations for obesity

**A** Swedish Adjustable Gastric Band (AGB)

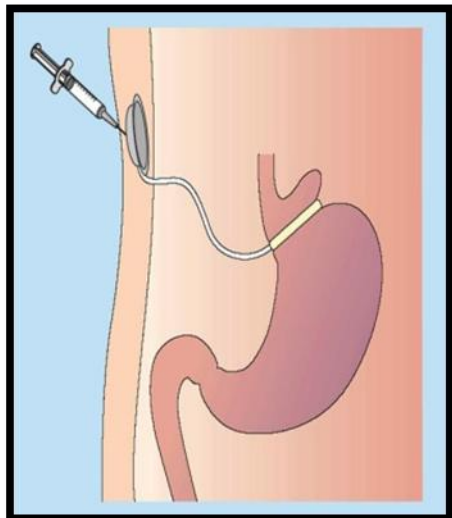

**B** Roux-en-Y gastric bypass (RGB)

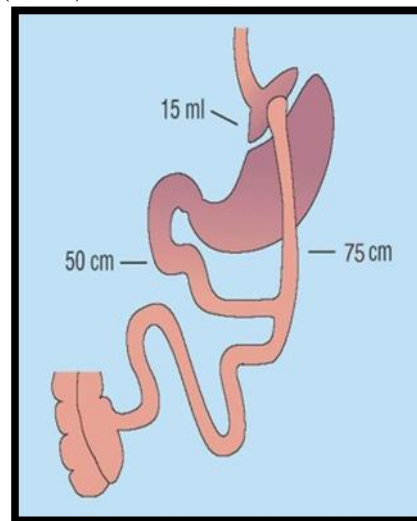

**C** SAGB with duodeno-jejunal bypass (HYB)

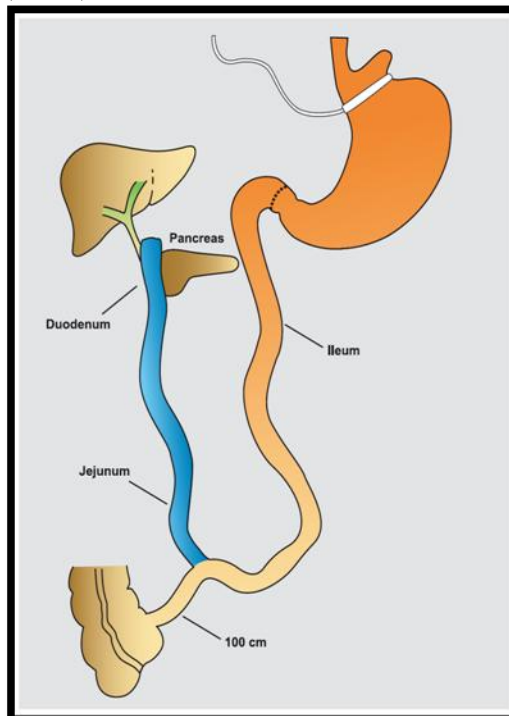

## Supplementary Figure S3. Functional investigation of five identified *MC4R* mutations that had not been reported previously

Curves show mean ( $\pm$  SE) response of wild-type (WT) and mutant receptors (p.S36T, p.V128L, p.I185F, p.T246A and p.I251F) to addition of increasing amounts of ligand ( $\alpha$  melanocyte-stimulating hormone) on a logarithmic scale, in a cAMP-responsive enzyme immuno-assay.

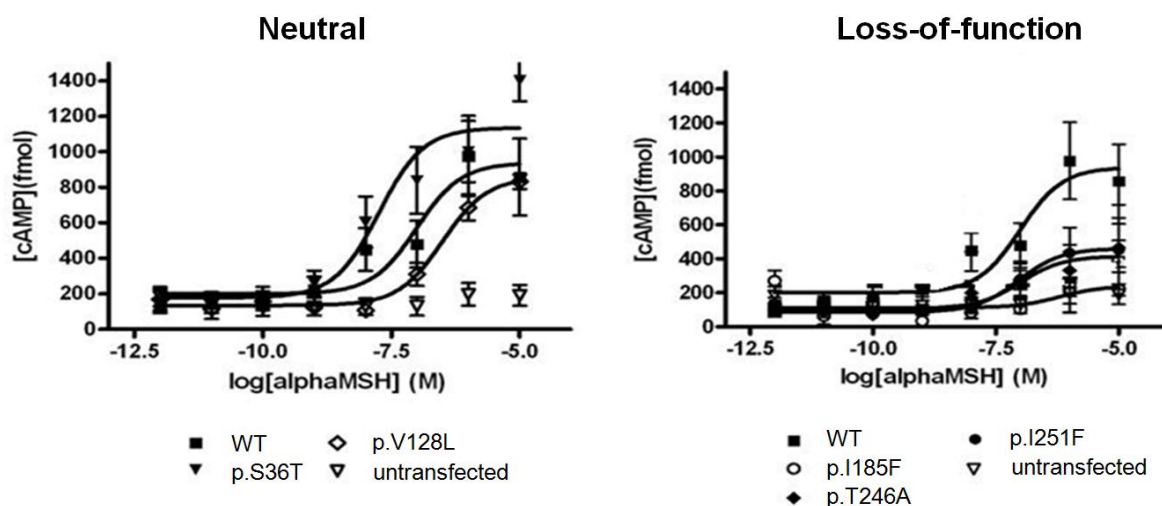

## References

1. Wang Z-Q, Tao Y-X. Functional studies on twenty novel naturally occurring melanocortin-4 receptor mutations. *Biochim Biophys Acta BBA - Mol Basis Dis*. 2011 Sep;1812(9):1190–9.
2. Xiang Z, Litherland SA, Sorensen NB, Proneth B, Wood MS, Shaw AM, et al. Pharmacological characterization of 40 human melanocortin-4 receptor polymorphisms with the endogenous proopiomelanocortin-derived agonists and the agouti-related protein (AGRP) antagonist. *Biochemistry (Mosc)*. 2006 Jun 13;45(23):7277–88.
3. Alfieri A, Pasanisi F, Salzano S, Esposito L, Martone D, Tafuri D, et al. Functional analysis of melanocortin-4-receptor mutants identified in severely obese subjects living in Southern Italy. *Gene*. 2010 Jun 1;457(1-2):35–41.
4. Santoro N, Cirillo G, Xiang Z, Tanas R, Greggio N, Morino G, et al. Prevalence of pathogenetic MC4R mutations in Italian children with early onset obesity, tall stature and familial history of obesity. *BMC Med Genet*. 2009;10:25.
